# Supplementary material for: A Cross-Sectional Retrospective Study of Non-Splenectomized and Never-Treated Patients with Type 1 Gaucher Disease
Source: PubMed Central journal article supplement (PMC7464688; doi:10.3390/jcm9082343), 2020-07-22
Supplement: jcm-09-02343-s001.pdf [file jcm-09-02343-s001.pdf]

Supplementary material

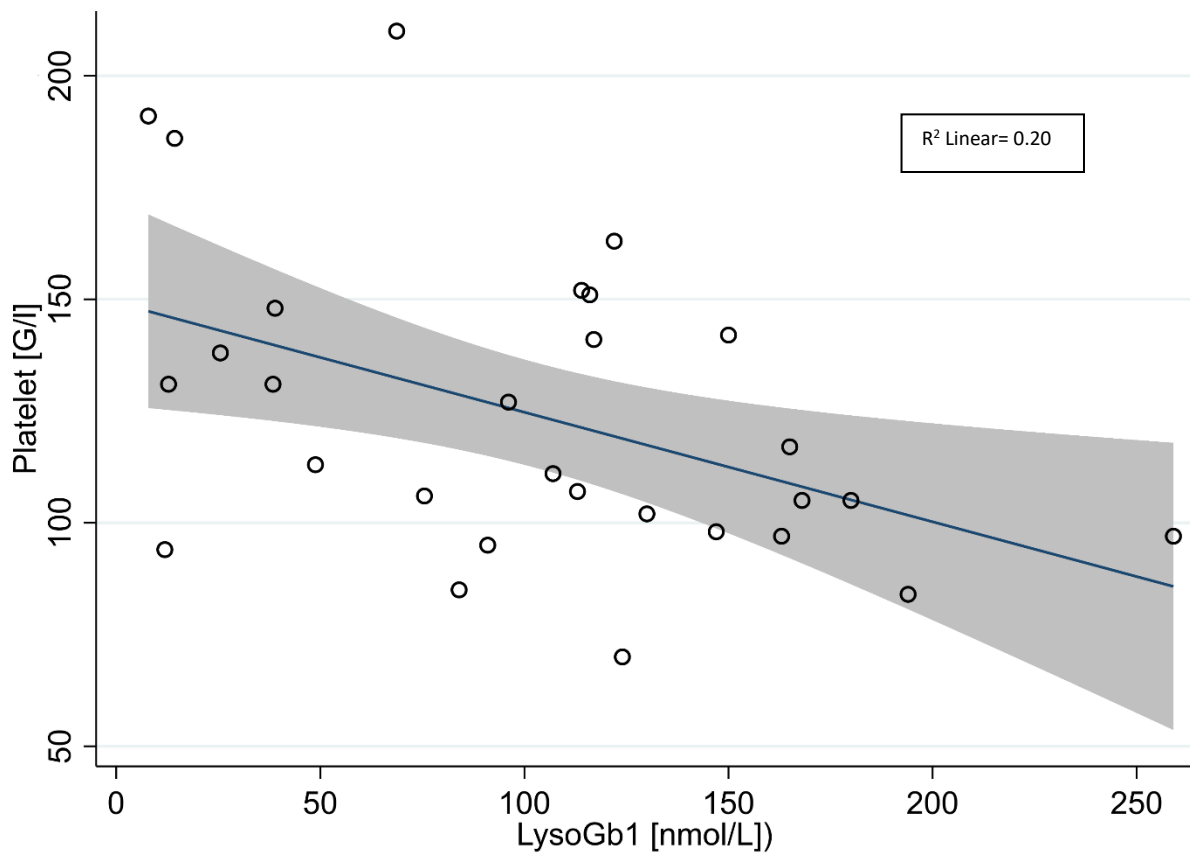

**Figure S1.** Correlation between lyso-Gb1 and platelet count at the last evaluation.
